# Supplementary material
Source: MDPI journal article supplement (https://www.mdpi.com/2673-9410/2/1/2)
Supplement: s1 [file s1]

Archive with 2 entries (2 files):
- Supplementary Materials_Figures_REV.pdf
- Supplementary Materials_Tables_Ahn.xlsx
