# Supplementary material
Source: MDPI journal article supplement (https://www.mdpi.com/2673-9410/2/1/2)
Supplement: s1 [file s1 › Supplementary Materials_Tables_Ahn.xlsx]

## Sheet: Intro
Supplementary Materials
Shining light on photosynthesis in the harmful dinoflagellate Karenia mikimotoi– Responses to short-term changes in temperature, nitrogen form and availability
So Hyun (Sophia) Ahn and Patricia M. Glibert
The following tables provide the results of rapid light curves for cultures of Karenia mikimotoi. Data were collected using a Walz Imaging PAM.
Cultures of Karenia mikimotoi were enriched with either nitrate (NO3-), ammonium (NH4+) or urea with varying amounts (1, 5, 10, 20, 50 µM-N) and were incubated for 1 hr at temperatures of 15, 20, 25, 30°C.
Table 1 provides the data of YII, YNPQ, YNO, 1-qP, and rETR
Table 2 provides the carculated alpha, saturation irradiance, Ik, rETRmax and, photoinhibition parameter, beta, calculated using the R package ‘phytotools’

## Sheet: Table S1
Table S1. Original data of YII, YNPQ, YNO, 1-qP, and rETR
N form	PAR	Y(II)																				Y(NPQ)																				Y(NO)
		1µM15°C	2µM15°C	10µM15°C	20µM15°C	50µM15°C	1µM20°C	2µM20°C	10µM20°C	20µM20°C	50µM20°C	1µM25°C	2µM25°C	10µM25°C	20µM25°C	50µM25°C	1µM30°C	2µM30°C	10µM30°C	20µM30°C	50µM30°C	1µM15°C	2µM15°C	10µM15°C	20µM15°C	50µM15°C	1µM20°C	2µM20°C	10µM20°C	20µM20°C	50µM20°C	1µM25°C	2µM25°C	10µM25°C	20µM25°C	50µM25°C	1µM30°C	2µM30°C	10µM30°C	20µM30°C	50µM30°C	1µM15°C	2µM15°C	10µM15°C	20µM15°C	50µM15°C	1µM20°C	2µM20°C	10µM20°C
NO3-	0	0.392	0.408	0.407	0.433	0.416	0.38	0.423	0.452	0.433	0.469	0.457	0.425	0.452	0.457	0.476	0	0.076	0.04	0	0	0	0	0	0	0	0	0	0	0	0	0	0	0	0	0	0.022	0	0	0.037	0	0.608	0.592	0.593	0.568	0.584	0.62	0.577	0.548
NO3-	4	0.37	0.386	0.382	0.414	0.397	0.355	0.4	0.428	0.409	0.448	0.438	0.408	0.436	0.438	0.461	0	0.065	0	0.047	0	0.004	0.003	0.003	0.003	0.004	0.002	0.005	0.006	0.004	0.006	0.007	0.005	0.007	0.007	0.005	0	0	0	0	0	0.625	0.611	0.615	0.583	0.6	0.643	0.595	0.565
NO3-	10	0.355	0.377	0.368	0.394	0.376	0.338	0.393	0.415	0.396	0.43	0.418	0.391	0.425	0.423	0.447	0.045	0.073	0.041	0.065	0.049	0.006	0.004	0.004	0.003	0.003	0.003	0.002	0.018	0.007	0.01	0.026	0.019	0.018	0.024	0.008	0	0	0	0	0	0.639	0.62	0.628	0.603	0.621	0.659	0.605	0.567
NO3-	28	0.265	0.292	0.25	0.239	0.231	0.239	0.311	0.314	0.309	0.337	0.277	0.296	0.321	0.31	0.356	0.04	0.077	0	0.066	0.049	0.043	0.008	0.044	0.035	0.055	0.008	0.006	0.041	0.039	0.04	0.043	0.031	0.03	0.032	0.008	0	0	0	0	0	0.692	0.7	0.706	0.726	0.714	0.753	0.682	0.644
NO3-	53	0.174	0.189	0.184	0.203	0.186	0.161	0.199	0.213	0.202	0.228	0.193	0.18	0.214	0.206	0.234	0.041	0.07	0	0.062	0.049	0.112	0.09	0.102	0.08	0.11	0.083	0.059	0.089	0.079	0.077	0.08	0.072	0.058	0.069	0.056	0	0.002	0	0	0	0.714	0.721	0.715	0.717	0.704	0.755	0.742	0.698
NO3-	86	0.149	0.167	0.161	0.187	0.173	0.139	0.165	0.184	0.177	0.201	0.171	0.158	0.181	0.186	0.208	0	0.038	0	0.049	0	0.18	0.15	0.168	0.129	0.159	0.137	0.123	0.138	0.13	0.118	0.122	0.133	0.112	0.111	0.098	0	0	0	0	0	0.671	0.683	0.671	0.684	0.669	0.725	0.711	0.678
NO3-	128	0.124	0.136	0.146	0.168	0.159	0.113	0.147	0.159	0.148	0.176	0.143	0.128	0.155	0.158	0.178	0	0.035	0	0.063	0.054	0.247	0.221	0.219	0.175	0.209	0.204	0.171	0.177	0.187	0.166	0.18	0.201	0.17	0.169	0.157	0	0.024	0	0	0	0.629	0.643	0.635	0.657	0.632	0.683	0.682	0.664
NO3-	178	0.093	0.106	0.108	0.138	0.13	0.088	0.12	0.129	0.125	0.144	0.111	0.098	0.124	0.125	0.146	0	0	0	0	0	0.309	0.286	0.291	0.236	0.279	0.257	0.226	0.223	0.253	0.241	0.264	0.282	0.247	0.253	0.234	0	0.086	0	0.086	0	0.598	0.608	0.6	0.626	0.591	0.655	0.654	0.648
NO3-	236	0.075	0.08	0.095	0.117	0.114	0.076	0.097	0.111	0.103	0.124	0.074	0.076	0.097	0.099	0.112	0	0	0	0	0	0.357	0.355	0.344	0.296	0.336	0.302	0.288	0.291	0.324	0.31	0.357	0.357	0.332	0.337	0.332	0.086	0.111	0	0.111	0	0.569	0.565	0.562	0.588	0.55	0.622	0.614	0.597
NO3-	377	0.049	0.06	0.055	0.076	0.081	0.05	0.06	0.075	0.075	0.082	0.044	0.049	0.066	0.068	0.083	0	0	0	0	0	0.385	0.375	0.385	0.373	0.358	0.323	0.368	0.383	0.397	0.403	0.419	0.404	0.419	0.423	0.416	0.099	0.136	0	0.111	0	0.565	0.565	0.56	0.552	0.56	0.627	0.572	0.542
NO3-	460	0.047	0.055	0.058	0.068	0.066	0.045	0.05	0.063	0.06	0.072	0.042	0.042	0.058	0.063	0.065	0	0	0	0	0	0.411	0.413	0.414	0.385	0.419	0.369	0.399	0.451	0.412	0.425	0.475	0.455	0.446	0.442	0.451	0.099	0.147	0	0.124	0	0.541	0.532	0.528	0.546	0.515	0.586	0.551	0.487
NO3-	671	0	0.044	0.042	0	0	0.043	0.041	0.04	0	0	0	0	0	0	0	0	0	0	0	0	0.481	0.445	0.455	0.497	0.509	0.396	0.443	0.483	0.505	0.547	0.553	0.523	0.544	0.544	0.55	0.111	0.158	0	0.147	0	0.519	0.511	0.503	0.503	0.491	0.56	0.515	0.477
NH4+	0	0.382	0.426	0.441	0.417	0.466	0.463	0.394	0.45	0.414	0.463	0.435	0.465	0.478	0.483	0.496	0.116	0.053	0.066	0.073	0.053	0	0	0	0	0	0	0	0	0	0	0	0	0	0	0	0	0	0	0	0	0.618	0.574	0.559	0.583	0.534	0.537	0.606	0.55
NH4+	4	0.357	0.401	0.418	0.388	0.443	0.44	0.376	0.428	0.392	0.441	0.418	0.446	0.455	0.462	0.47	0.105	0.057	0.067	0.078	0.053	0.002	0.002	0.003	0.003	0.004	0.005	0.003	0.005	0.004	0.007	0.002	0.004	0.007	0.004	0.006	0	0	0	0	0	0.642	0.596	0.579	0.609	0.552	0.555	0.621	0.567
NH4+	10	0.345	0.39	0.407	0.374	0.434	0.425	0.363	0.41	0.376	0.426	0.405	0.433	0.438	0.448	0.455	0.094	0.052	0.075	0.085	0.059	0.002	0.002	0.002	0.002	0.002	0.006	0.003	0.019	0.005	0.025	0.004	0.007	0.018	0.005	0.008	0	0	0	0	0	0.654	0.608	0.591	0.623	0.564	0.569	0.634	0.571
NH4+	28	0.291	0.347	0.37	0.338	0.388	0.368	0.332	0.377	0.353	0.388	0.351	0.379	0.396	0.408	0.419	0.093	0.065	0.086	0.093	0.073	0.052	0.047	0.039	0.008	0.009	0.053	0.038	0.038	0.03	0.008	0.006	0.028	0.034	0.027	0.026	0.001	0	0	0	0	0.657	0.606	0.592	0.654	0.603	0.579	0.63	0.584
NH4+	53	0.184	0.226	0.25	0.25	0.291	0.226	0.23	0.276	0.265	0.282	0.2	0.242	0.272	0.309	0.3	0.091	0.062	0.075	0.094	0.078	0.101	0.066	0.053	0.034	0.033	0.087	0.045	0.052	0.033	0.042	0.068	0.064	0.053	0.04	0.04	0.004	0	0	0	0	0.715	0.708	0.697	0.716	0.676	0.687	0.725	0.672
NH4+	86	0.142	0.169	0.183	0.172	0.213	0.18	0.163	0.19	0.18	0.214	0.158	0.185	0.197	0.215	0.219	0.063	0.058	0.079	0.085	0.064	0.19	0.132	0.111	0.103	0.068	0.13	0.094	0.08	0.071	0.066	0.134	0.101	0.09	0.068	0.057	0.01	0	0	0	0	0.668	0.699	0.706	0.725	0.72	0.69	0.743	0.73
NH4+	128	0.113	0.14	0.144	0.138	0.174	0.154	0.136	0.159	0.142	0.178	0.133	0.155	0.163	0.176	0.178	0	0.045	0.063	0.065	0.069	0.264	0.205	0.181	0.182	0.131	0.179	0.164	0.123	0.127	0.091	0.208	0.153	0.142	0.112	0.082	0.124	0	0	0	0	0.623	0.655	0.675	0.68	0.695	0.668	0.7	0.718
NH4+	178	0.098	0.12	0.131	0.123	0.154	0.126	0.113	0.129	0.114	0.15	0.109	0.123	0.138	0.144	0.149	0	0	0	0.04	0	0.314	0.268	0.252	0.248	0.186	0.247	0.235	0.199	0.203	0.134	0.285	0.225	0.206	0.181	0.143	0.158	0	0	0	0	0.588	0.611	0.617	0.629	0.66	0.628	0.652	0.672
NH4+	236	0.083	0.095	0.104	0.1	0.131	0.105	0.096	0.112	0.105	0.138	0.087	0.106	0.117	0.122	0.129	0	0	0.04	0.041	0.05	0.349	0.332	0.323	0.319	0.252	0.323	0.302	0.271	0.273	0.191	0.357	0.293	0.282	0.261	0.215	0.18	0.073	0.032	0	0	0.568	0.573	0.573	0.581	0.617	0.572	0.602	0.617
NH4+	377	0.057	0.071	0.08	0.083	0.103	0.061	0.057	0.072	0.067	0.094	0.056	0.068	0.08	0.087	0.095	0	0	0	0	0	0.352	0.384	0.386	0.369	0.329	0.408	0.34	0.363	0.354	0.283	0.398	0.391	0.381	0.358	0.309	0.211	0.086	0.099	0.086	0	0.592	0.544	0.534	0.548	0.568	0.53	0.603	0.565
NH4+	460	0.059	0.064	0.075	0.079	0.087	0.06	0.052	0.073	0.073	0.088	0.056	0.054	0.069	0.085	0.087	0	0	0	0	0	0.371	0.386	0.433	0.409	0.397	0.429	0.377	0.421	0.394	0.346	0.441	0.431	0.451	0.424	0.392	0.22	0.111	0.124	0.111	0	0.57	0.551	0.492	0.512	0.516	0.511	0.57	0.506
NH4+	671	0.047	0.054	0.059	0.06	0.074	0.057	0.055	0.056	0.056	0.059	0.044	0.044	0.051	0.05	0.046	0	0	0	0	0	0.403	0.431	0.45	0.421	0.415	0.473	0.404	0.448	0.416	0.39	0.486	0.486	0.483	0.474	0.459	0.239	0.136	0.158	0.136	0.086	0.551	0.515	0.491	0.519	0.511	0.47	0.541	0.495
Urea	0	0.445	0.413	0.446	0.44	0.421	0.389	0.422	0.43	0.434	0.436	0.454	0.444	0.466	0.464	0.463	0.167	0.213	0.197	0.167	0.112	0	0	0	0	0	0	0	0	0	0	0	0	0	0	0	0	0	0	0	0	0.555	0.587	0.554	0.56	0.579	0.611	0.578	0.57
Urea	4	0.414	0.384	0.422	0.411	0.395	0.373	0.404	0.413	0.418	0.421	0.433	0.424	0.446	0.445	0.449	0.154	0.199	0.177	0.152	0.102	0.005	0.003	0.003	0.003	0	0.002	0.003	0.004	0.006	0.028	0.003	0.003	0.004	0.005	0.001	0	0	0	0	0	0.581	0.612	0.575	0.586	0.605	0.625	0.593	0.584
Urea	10	0.407	0.374	0.413	0.399	0.383	0.356	0.392	0.401	0.404	0.402	0.425	0.415	0.437	0.437	0.44	0.154	0.194	0.182	0.145	0.107	0.003	0.002	0.002	0.001	0	0.004	0.006	0.004	0.006	0.037	0.003	0.002	0.006	0.008	0	0	0	0	0	0	0.59	0.624	0.585	0.6	0.618	0.64	0.602	0.595
Urea	28	0.276	0.264	0.291	0.278	0.277	0.288	0.313	0.328	0.323	0.318	0.315	0.3	0.306	0.325	0.346	0.144	0.171	0.166	0.129	0.103	0.034	0.034	0.032	0.033	0.007	0.008	0.022	0.005	0.03	0.051	0.021	0.023	0.041	0.04	0.006	0.001	0.001	0	0.002	0.001	0.69	0.702	0.677	0.689	0.716	0.703	0.665	0.667
Urea	53	0.197	0.179	0.2	0.2	0.186	0.178	0.197	0.206	0.205	0.197	0.196	0.193	0.205	0.214	0.219	0.104	0.112	0.113	0.115	0.096	0.088	0.092	0.08	0.089	0.101	0.07	0.059	0.048	0.069	0.089	0.059	0.06	0.079	0.077	0.047	0.005	0.003	0.003	0.006	0.002	0.715	0.729	0.72	0.711	0.713	0.752	0.744	0.746
Urea	86	0.169	0.16	0.174	0.18	0.163	0.156	0.176	0.181	0.186	0.181	0.169	0.168	0.182	0.192	0.192	0.065	0.076	0.081	0.092	0.089	0.141	0.16	0.148	0.149	0.191	0.142	0.112	0.111	0.129	0.148	0.113	0.113	0.129	0.111	0.099	0.093	0.079	0.055	0.079	0.005	0.69	0.68	0.678	0.671	0.646	0.701	0.712	0.708
Urea	128	0.143	0.133	0.149	0.147	0.148	0.13	0.142	0.145	0.153	0.154	0.14	0.139	0.152	0.168	0.164	0.041	0.054	0.054	0.063	0.057	0.205	0.222	0.211	0.226	0.26	0.199	0.181	0.18	0.194	0.21	0.172	0.173	0.195	0.166	0.159	0.118	0.128	0.105	0.072	0.042	0.653	0.645	0.64	0.626	0.592	0.671	0.678	0.675
Urea	178	0.11	0.11	0.123	0.121	0.119	0.106	0.116	0.125	0.132	0.134	0.109	0.115	0.124	0.142	0.145	0	0.044	0.05	0.061	0.059	0.285	0.285	0.286	0.3	0.329	0.252	0.249	0.247	0.265	0.277	0.244	0.243	0.273	0.228	0.22	0.211	0.146	0.108	0.108	0.065	0.606	0.605	0.59	0.58	0.552	0.641	0.635	0.628
Urea	236	0.099	0.1	0.11	0.119	0.113	0.087	0.101	0.107	0.117	0.121	0.088	0.088	0.093	0.116	0.117	0	0	0.032	0.041	0	0.347	0.336	0.348	0.345	0.371	0.312	0.313	0.317	0.33	0.339	0.324	0.324	0.355	0.308	0.307	0.248	0.248	0.178	0.169	0.158	0.554	0.564	0.542	0.536	0.515	0.602	0.586	0.576
Urea	377	0.058	0.068	0.074	0.074	0.074	0.054	0.072	0.075	0.084	0.085	0.068	0.071	0.066	0.09	0.095	0	0	0	0	0	0.396	0.362	0.42	0.375	0.389	0.343	0.389	0.388	0.403	0.411	0.405	0.399	0.437	0.396	0.393	0.282	0.29	0.248	0.22	0.169	0.546	0.57	0.506	0.551	0.537	0.603	0.539	0.537
Urea	460	0.067	0.072	0.08	0.074	0.084	0.048	0.058	0.056	0.073	0.07	0.056	0.058	0.063	0.073	0.085	0	0	0	0	0	0.426	0.391	0.454	0.406	0.405	0.387	0.41	0.411	0.411	0.423	0.437	0.422	0.445	0.464	0.451	0.305	0.334	0.282	0.239	0.18	0.507	0.537	0.467	0.519	0.511	0.565	0.532	0.532
Urea	671	0.043	0.052	0.052	0.047	0	0.06	0.053	0.046	0.058	0.062	0.039	0.046	0.043	0.045	0.049	0	0	0	0	0	0.484	0.441	0.471	0.458	0.509	0.394	0.448	0.451	0.454	0.451	0.495	0.474	0.501	0.499	0.481	0.334	0.361	0.313	0.248	0.18	0.473	0.507	0.477	0.495	0.491	0.546	0.499	0.503
[truncated: 52 more columns]

## Sheet: Table S2
Table S2. rETR parameters. Intitial slope of light curve, alpha, saturation irradiance, Ik, rETRmax and, photoinhibition parameter, beta, were calculated using the R package ‘phytotools’
N form	Temperature (°C)	Concentration (µM)	Alpha	rETRmax	Ik	Beta	Note
NO3-	15	1	0.104759	8.18795	78.1601	0	1~460 light range data were used
NO3-	15	5	0.0892887	10.8915	121.981	0
NO3-	15	10	0.0971191	10.779	110.988	0
NO3-	15	20	0.114125	13.0595	114.431	0	1~460 light range data were used
NO3-	15	50	0.0976342	12.8413	131.525	0.00608648	1~460 light range data were used
NO3-	20	1	0.0668369	10.2012	152.628	0
NO3-	20	5	0.116124	10.3673	89.2777	0
NO3-	20	10	0.11518	11.7986	102.436	0.00248914
NO3-	20	20	0.109392	11.8433	108.265	0	1~460 light range data were used
NO3-	20	50	0.126647	13.7109	108.261	0	1~460 light range data were used
NO3-	25	1	0.141429	7.85278	55.5246	0.00264925	1~460 light range data were used
NO3-	25	5	0.127113	7.83465	61.6351	0	1~460 light range data were used
NO3-	25	10	0.125651	10.732	85.4114	0	1~460 light range data were used
NO3-	25	20	0.119621	11.3318	94.7309	0	1~460 light range data were used
NO3-	25	50	0.137943	12.7307	92.2898	0	1~460 light range data were used
NO3-	30	1	0.0121748	0.003994	0.328055	0.999965
NO3-	30	5	0.0646815	1.49248	23.0744	87.4735
NO3-	30	10	0.0193627	0.00138354	0.0714538	0.999992
NO3-	30	20	0.0647056	1.7925	27.7024	215.377
NO3-	30	50	0.0355528	1.05739	29.7414	1.14912
NH4+	15	1	0.0672734	12.0732	179.466	0
NH4+	15	5	0.0867215	13.584	156.639	0
NH4+	15	10	0.0898918	15.5348	172.816	0
NH4+	15	20	0.0795262	16.8126	211.409	0
NH4+	15	50	0.102477	19.7717	192.937	0
NH4+	20	1	0.101053	12.9303	127.956	0
NH4+	20	5	0.0878153	12.1134	137.942	0
NH4+	20	10	0.105964	14.1807	133.827	0
NH4+	20	20	0.0887726	14.239	160.398	0
NH4+	20	50	0.121918	16.6541	136.6	0
NH4+	25	1	0.0944491	10.7835	114.172	0
NH4+	25	5	0.133086	11.0874	83.3098	0
NH4+	25	10	0.126386	13.4089	106.095	0
NH4+	25	20	0.13486	14.591	108.194	0
NH4+	25	50	0.122033	15.0196	123.079	0.0128766
NH4+	30	1	0.0977418	1.68832	17.2733	80.9089
NH4+	30	5	0.0650864	1.66868	25.6378	121.29
NH4+	30	10	0.0613518	2.54108	41.4181	0.968107
NH4+	30	20	0.0734806	3.30168	44.9327	12.5075
NH4+	30	50	0.055228	2.58793	46.8591	1.10927
Urea	15	1	0.0955507	11.6384	121.803	0
Urea	15	5	0.0746533	14.477	193.923	0
Urea	15	10	0.08976	14.7472	164.296	0
Urea	15	20	0.0993037	13.5807	136.759	0
Urea	15	50	0.0822119	15.9734	194.295	0	1~460 light range data were used
Urea	20	1	0.061862	13.8913	224.554	0
Urea	20	5	0.0892793	13.0691	146.384	0
Urea	20	10	0.109336	12.0101	109.846	0
Urea	20	20	0.0943696	15.581	165.106	0
Urea	20	50	0.0908017	16.136	177.706	0
Urea	25	1	0.102932	10.7812	104.742	0
Urea	25	5	0.091033	11.9846	131.651	0
Urea	25	10	0.110174	11.4909	104.297	0
Urea	25	20	0.105402	13.7649	130.595	0.0115691
Urea	25	50	0.0954546	15.2387	159.644	0.0352051
Urea	30	1	0.110976	2.32029	20.908	250.61
Urea	30	5	0.0993598	2.97148	29.9063	79.9887
Urea	30	10	0.0829387	3.3857	40.8217	121.576
Urea	30	20	0.0856093	3.80727	44.4726	1000
Urea	30	50	0.0852415	3.00576	35.2617	98.3552
